# Supplementary material for: Tethered peptide neurotoxins display two blocking mechanisms in the K+ channel pore as do their untethered analogs
Source: PubMed Central journal article supplement — Sci Adv. 2020 Mar 4;6(10):eaaz3439. doi: 10.1126/sciadv.aaz3439 (PMC7056315; doi:10.1126/sciadv.aaz3439), 2020-03-04
Supplement: aaz3439_SM.pdf [file aaz3439_SM.pdf]

## Supplementary Materials for

### **Tethered peptide neurotoxins display two blocking mechanisms in the K<sup>+</sup> channel pore as do their untethered analogs**

Ruiming Zhao, Hui Dai, Netanel Mendelman, Jordan H. Chill\*, Steve A. N. Goldstein\*

\*Corresponding author. Email: sgoldst2@uci.edu (S.A.N.G.); jordan.chill@biu.ac.il (J.H.C.)

Published 4 March 2020, *Sci. Adv.* **6**, eaaz3439 (2020)

DOI: 10.1126/sciadv.aaz3439

#### **This PDF file includes:**

- Fig. S1. Concentration-response relationship of HmK blockade of KcsA-Shaker.
- Fig. S2. Effect of mutation KcsA-Shaker–Y82V on block by TEA and HmK.
- Fig. S3. Hui1-Arg<sup>23</sup> mediates the voltage-dependent block of KcsA-Shaker.
- Fig. S4. Structures of HmK, ShK, and Hui1 toxins noting some important, conserved residues.
- Table S1. Single-particle counting and calculation of effective T-HmK surface concentration.
- Table S2. Single-particle counting and calculation of effective T-HmK surface concentration with coexpression of KcsA-Shaker channels.
- Table S3. Blocking parameters of hKv1.3 by T-HmK, T-ShK, and the analogous free peptide variants.
- Table S4. <sup>1</sup>H chemical shifts of HmK.
- Table S5. Heteronuclear chemical shifts of HmK.
- Table S6. Statistics for HmK structure calculation.

## Supplementary Materials

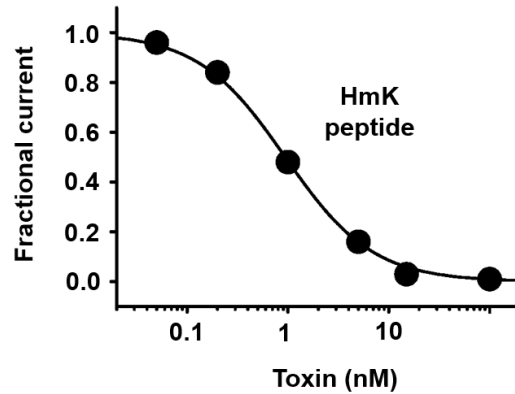

**Fig. S1. Concentration-response relationship of HmK blockade of KcsA-Shaker.** Inhibition of peptide HmK (●) on KcsA-Shaker was studied by TEVC as described in Materials and Methods and fit to the Hill relationship (Eqn 1). The  $K_i$  of peptide HmK for KcsA-Shaker channels was estimated from the fit to be  $0.94 \pm 0.08$  nM with a Hill coefficient of  $1.03 \pm 0.09$ .  $n = 6$  for each condition. Values are mean  $\pm$  SEM. Error bars are smaller than symbols.

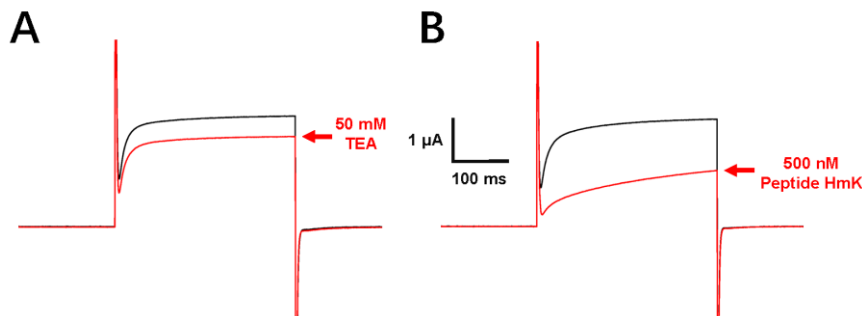

**Fig. S2. Effect of mutation KcsA-Shaker-Y82V on block by TEA and HmK.** KcsA-Shaker-Y82V were expressed in oocytes and studied by TEVC to assess equilibrium inhibition using a holding voltage of  $-80$  mV, 300 ms test pulses to 0 mV, and a 5 s interpulse interval. (A) Representative current trace for KcsA-Shaker-Y82V with 50 mM TEA (red) or without TEA application (black). (B) Representative current trace for KcsA-Shaker-Y82V with 500 nM peptide HmK (red) or without peptide application (black).

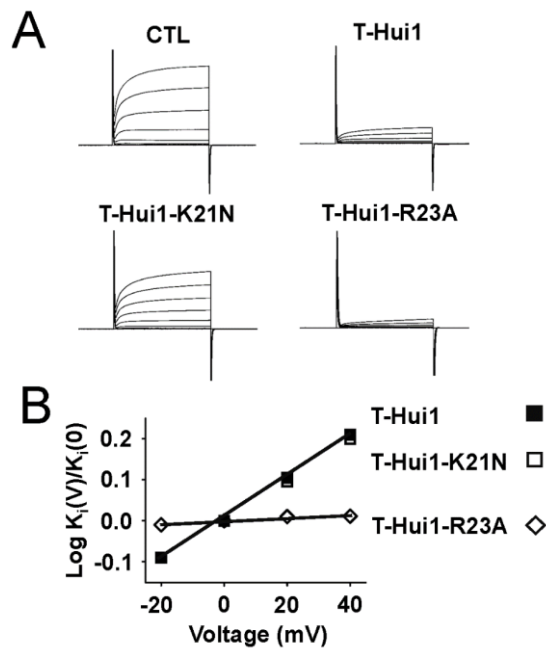

**Fig. S3. Hui1-Arg<sup>23</sup> mediates the voltage-dependent block of KcsA-Shaker.** KcsA-Shaker with or without T-Hui1 and variants co-injection were expressed in oocytes and studied by TEVC to assess equilibrium inhibition using a holding voltage of  $-80$  mV, 300 ms test pulses, and a 5 s interpulse interval,  $n = 18$  cells for each condition. Values are mean  $\pm$  SEM. Some error bars are smaller than symbols. **(A)** Representative current traces (steps of 20 mV from  $-80$  mV to 60 mV) for KcsA-Shaker channels without (CTL), or with co-expression of T-Hui1, T-Hui1-K22N and T-Hui1-R23A after 0.25 ng cRNAs co-injection. **(B)** Effect of voltage on blockade of KcsA-Shaker by T-Hui1 mutants.  $K_i$  for T-toxins was determined from  $-20$  mV to 40 mV based on the fraction of unblocked current at equilibrium ( $F_{un}$ ) and plotted as a ratio to the value at 0 mV.

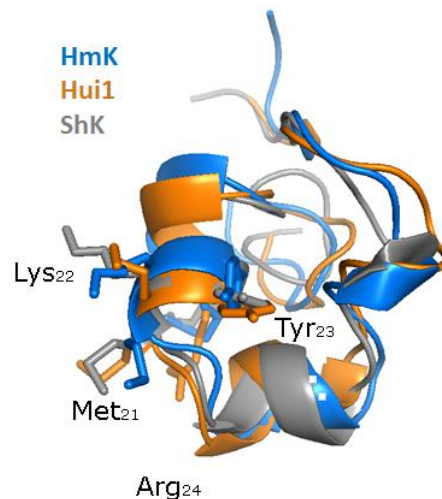

**Fig. S4. Structures of HmK, ShK, and Hui1 toxins noting some important, conserved residues.** HmK 3D structure adopts a typical SAK1 helix-kink-helix conformation, with residues 14-18 and 22-26 forming two short perpendicular  $\alpha$ -helices. Side chain residues Met<sub>21</sub>-Lys<sub>22</sub>-Tyr<sub>23</sub>-Arg<sub>24</sub> of ShK and HmK (Met<sub>20</sub>-Lys<sub>21</sub>-Tyr<sub>22</sub>-Arg<sub>23</sub> of Hui1) are noted. HmK (blue, this work, PDB 6EI7); Hui1 (2N6B, orange); and ShK (4LFQ, grey).

**Table S1. Single-particle counting and calculation of effective T-HmK surface concentration.** As described in Materials and Methods, T-RFP and T-HmK were expressed in *Xenopus* oocytes by injection of cRNA; single fluorescent particles in  $100 \mu\text{m}^2$  (n) were counted by smTIRF microscopy; simultaneous photobleaching revealed that all particles contained only one T-RFP (n = 170); average number of T-RFP peptides on the surface of oocytes (N) was estimated based on average surface area; and because the relative surface expression of T-RFP and T-HmK were consistently related (Fig. 1H), the effective concentration of T-HmK could be estimated from the counted number of T-RFP (Fig. 1F) and the measured T-HmK by ELISA (Fig. 1, G and H). With 0.5 ng cRNA injection, the effective concentration of T-HmK is estimated to be  $17 \pm 2$  nM and the  $K_i$  of T-HmK block of KcsA-Shaker to be  $1.1 \pm 0.1$  nM, according to Eqn 1. The calculated concentrations of T-HmK with 0.35 and 1 ng cRNA estimated by electrophysiology ( $F_{un}$ ) are similar to those estimated by ELISA and smTIRF.

| T-peptides expressed | Analysis                              | Determined/Calculated values |                 |                                       |                                       |                                       |                 |                   |
|----------------------|---------------------------------------|------------------------------|-----------------|---------------------------------------|---------------------------------------|---------------------------------------|-----------------|-------------------|
| T-RFP                | cRNA (ng) injected                    |                              |                 | 0.35                                  | 0.5                                   | 1                                     |                 |                   |
|                      | particles per $100 \mu\text{m}^2$ (n) |                              |                 | $7 \pm 1$                             | $16 \pm 2$                            | $43 \pm 5$                            |                 |                   |
|                      | number per oocyte (N)                 |                              |                 | $3.5 \times 10^5 \pm 0.5 \times 10^5$ | $8.0 \times 10^5 \pm 1.0 \times 10^5$ | $2.2 \times 10^6 \pm 0.3 \times 10^6$ |                 |                   |
| T-HmK                | cRNA (ng) injected                    | 0.01                         | 0.05            | 0.1                                   | 0.25                                  | 0.35                                  | 0.5             | 1                 |
|                      | $F_{un}$ (fraction unblocked I)       | $0.98 \pm 0.03$              | $0.80 \pm 0.07$ | $0.52 \pm 0.06$                       | $0.24 \pm 0.03$                       | $0.13 \pm 0.01$                       | $0.06 \pm 0.01$ | $0.025 \pm 0.002$ |
|                      | concentration by $F_{un}$ (nM)        | $0.022 \pm 0.003$            | $0.28 \pm 0.03$ | $1.0 \pm 0.1$                         | $3.5 \pm 0.4$                         | $7.4 \pm 0.8$                         | $17 \pm 2$      | $43 \pm 2$        |
|                      | concentration by ELISA (nM)           |                              |                 | $8 \pm 1$                             | $17 \pm 2$                            | $47 \pm 5$                            |                 |                   |

**Table S2. Single-particle counting and calculation of effective T-HmK surface concentration with coexpression of KcsA-Shaker channels.**

T-RFP (1 ng) or T-HmK (1 ng) cRNA was injected with or without KcsA-Shaker (1 ng) in *Xenopus* oocytes, single particles counted, and ELISA performed, as described in *Materials and Methods*. The surface concentrations of T-HmK were estimated as described in table S1.

|                                       | T-toxin expressed with or without KcsA-Shaker channels |                 |               |                        |                        |                             |
|---------------------------------------|--------------------------------------------------------|-----------------|---------------|------------------------|------------------------|-----------------------------|
|                                       | T-HmK                                                  | T-RFP           | T-RFP / T-HmK | T-HmK with KcsA-Shaker | T-RFP with KcsA-Shaker | T-RFP / T-HmK + KcsA-Shaker |
| ELISA OD <sub>450</sub>               | $0.54 \pm 0.01$                                        | $0.40 \pm 0.01$ | $\sim 0.74$   | $0.56 \pm 0.01$        | $0.39 \pm 0.01$        | $\sim 0.70$                 |
| RFP particles per $100 \mu\text{m}^2$ | $43 \pm 5$                                             |                 |               | $41 \pm 6$             |                        |                             |
| T-HmK conc estimate (nM)              | $47 \pm 5$                                             |                 |               | $49 \pm 6$             |                        |                             |

**Table S3. Blocking parameters of hKv1.3 by T-HmK, T-ShK, and the analogous free peptide variants.** hKv1.3 inhibition at equilibrium ( $K_i \pm \text{SEM}$ ) was determined as described in Figs. 1 and 2; the kinetic parameters were assessed at 0 mV; n = 16-18 oocytes for T-toxins, and n = 6 oocytes for peptides.

| Toxins                            | $K_i$ (nM)        | $k_{on}$ (1/Ms)                       | $k_{off}$ (1/s)                             |
|-----------------------------------|-------------------|---------------------------------------|---------------------------------------------|
| T-HmK                             | $3.0 \pm 0.4$     | $5.4 \times 10^6 \pm 0.8 \times 10^6$ | $1.6 \times 10^{-2} \pm 0.2 \times 10^{-3}$ |
| T-HmK-Lys <sub>22</sub> Asn       | $702 \pm 88$      | $1.4 \times 10^6 \pm 0.2 \times 10^6$ | $9.3 \times 10^{-1} \pm 1.2 \times 10^{-1}$ |
| T-HmK-Arg <sub>24</sub> Gln       | $8.1 \pm 1.0$     | $5.3 \times 10^6 \pm 0.8 \times 10^6$ | $4.3 \times 10^{-2} \pm 0.6 \times 10^{-3}$ |
| T-ShK                             | $0.098 \pm 0.012$ | $1.2 \times 10^8 \pm 0.2 \times 10^8$ | $1.2 \times 10^{-2} \pm 0.2 \times 10^{-2}$ |
| T-ShK-Lys <sub>22</sub> Asn       | $0.42 \pm 0.05$   | $7.2 \times 10^7 \pm 0.7 \times 10^7$ | $3.1 \times 10^{-2} \pm 0.4 \times 10^{-2}$ |
| T-ShK-Arg <sub>24</sub> Gln       | $0.075 \pm 0.010$ | $9.9 \times 10^7 \pm 1.3 \times 10^7$ | $7.4 \times 10^{-3} \pm 0.8 \times 10^{-3}$ |
| Peptide HmK                       | $3.1 \pm 0.2$     | $1.1 \times 10^6 \pm 0.1 \times 10^6$ | $3.4 \times 10^{-3} \pm 0.2 \times 10^{-3}$ |
| Peptide HmK-Lys <sub>22</sub> Asn | $2225 \pm 238$    | $3.0 \times 10^5 \pm 0.4 \times 10^5$ | $6.7 \times 10^{-1} \pm 0.8 \times 10^{-1}$ |
| Peptide ShK                       | $0.05 \pm 0.01$   | $2.7 \times 10^7 \pm 0.4 \times 10^7$ | $1.3 \times 10^{-3} \pm 0.1 \times 10^{-3}$ |
| Peptide ShK-Lys <sub>22</sub> Asn | $1.2 \pm 0.1$     | $0.8 \times 10^7 \pm 0.1 \times 10^7$ | $9.6 \times 10^{-3} \pm 0.9 \times 10^{-3}$ |
| Peptide ShK-Arg <sub>24</sub> Gln | $0.034 \pm 0.006$ | $2.4 \times 10^7 \pm 0.3 \times 10^7$ | $0.8 \times 10^{-3} \pm 0.1 \times 10^{-3}$ |

**Table S4. <sup>1</sup>H chemical shifts of HmK.** Chemical shifts for HmK (1 mM) <sup>1</sup>H nuclei in 20 mM potassium phosphate buffer (pH 6.7) and 100 mM NaCl, determined at 293 K and 16.4 T. ND, not detected.

| Residue | <sup>1</sup> H <sup>N</sup> [ppm] | H <sup>α</sup> [ppm] | H <sup>β</sup> [ppm] | H <sup>γ</sup> [ppm] | H(others) [ppm]    |
|---------|-----------------------------------|----------------------|----------------------|----------------------|--------------------|
| T2      | ND                                | 4.22                 | 4.02                 | 1.15                 |                    |
| C3      | 9.10                              | 4.70                 | 2.92 / 3.00          |                      |                    |
| K4      | 7.88                              | 4.56                 | 1.69 / 1.77          | 1.08 / 1.28          | 1.56 / 2.87        |
| D5      | 8.67                              | 5.07                 | 2.60                 |                      |                    |
| L6      | 9.23                              | 4.45                 | 1.68                 | 1.75                 | 0.91 / 0.80        |
| I7      | 7.14                              | 4.80                 | 2.13                 | 1.38 / 0.86          | 0.88               |
| P8      |                                   | 4.28                 | 1.75 / 1.88          | 2.07 / 2.38          | 3.48 / 3.76        |
| V9      | 8.15                              | 3.57                 | 2.09                 | 0.98 / 1.06          |                    |
| S10     | 8.08                              | 4.00                 | 3.80 / 3.87          |                      |                    |
| E11     | 8.04                              | 4.18                 | 2.11 / 2.22          | 2.33                 |                    |
| C12     | 7.81                              | 4.82                 | 3.16 / 2.78          |                      |                    |
| T13     | 6.89                              | 4.14                 | 4.48                 | 1.12                 |                    |
| Q14     | 8.60                              | 4.09                 | 2.55 / 2.64          | ND                   |                    |
| I15     | 8.15                              | 3.86                 | 1.68                 | 0.79 / 1.38 / 1.14   | 0.84               |
| R16     | 7.22                              | 3.70                 | 1.04 / 1.61          | 1.52 / 1.32          | 2.752              |
| C17     | 8.42                              | 4.20                 | 3.02 / 3.12          |                      |                    |
| R18     | 7.90                              | 4.13                 | 1.82 / 1.73          | 1.57                 | 3.05 / 3.13 / 7.40 |
| T19     | 7.73                              | 4.53                 | 4.29                 | 1.19                 | 2.74 / 2.63        |
| S20     | 8.07                              | 5.10                 | 4.22 / 3.95          |                      |                    |
| M21*    | ND                                | 4.12                 | 2.00 / 2.10          | 2.55 / 2.74          | 2.05               |
| K22*    | ND                                | 3.99                 | 1.52 / 1.79          | 0.87                 | 1.19 / 2.74 / 2.63 |
| Y23     | 7.53                              | 3.95                 | 2.60 / 2.89          |                      | 7.34 / 6.76        |
| R24     | 8.44                              | 3.88                 | 1.66 / 2.46          | 1.49 / 1.40          | 3.19 / 3.30 / 7.23 |
| L25     | 8.26                              | 4.43                 | 1.51 / 1.76          | 1.57                 | 0.90 / 0.84        |
| N26     | 6.94                              | 5.03                 | 2.87 / 3.05          |                      |                    |
| L27     | 8.13                              | 4.12                 | 1.51                 | 1.39                 | 0.68 / 0.25        |
| C28     | 8.62                              | 5.64                 | 3.11 / 3.21          |                      |                    |
| R29     | 8.01                              | 3.81                 | 1.54 / 1.71          | 1.38 / 1.43          | 3.17 / 3.36 / 7.11 |
| K30     | 7.16                              | 4.12                 | 1.25 / 1.77          | 1.56                 | 1.66 / 2.94        |
| T31     | 10.97                             | 4.00                 | 3.78                 | 1.23                 |                    |
| C32     | 8.88                              | 4.75                 | 2.91 / 3.23          |                      |                    |
| G33     | 7.78                              | 4.04                 |                      |                      |                    |
| S34     | 8.82                              | 4.54                 | 3.86 / 3.96          |                      |                    |
| C35     | 7.83                              | 4.22                 | 3.03 / 3.23          |                      |                    |

**Table S5. Heteronuclear chemical shifts of HmK.** Heteronuclear chemical shifts for HmK determined as described in Table S4. ND, not detected.

| Residue | <sup>15</sup> N [ppm] | <sup>13</sup> C <sup>α</sup> [ppm] | <sup>13</sup> C <sup>β</sup> [ppm] |
|---------|-----------------------|------------------------------------|------------------------------------|
| T2      | ND                    | 62.36                              | 69.76                              |
| C3      | ND                    | 55.05                              | 38.00                              |
| K4      | 124.37                | 55.02                              | ND                                 |
| D5      | 121.90                | 54.53                              | ND                                 |
| Y6      | 120.20                | 55.00                              | ND                                 |
| L7      | 113.43                | 58.42                              | 38.58                              |
| P8      |                       | 63.42                              | ND                                 |
| K9      | 122.05                | 66.03                              | ND                                 |
| S10     | 115.22                | 59.26                              | 61.97                              |
| E11     | 118.68                | 56.09                              | 30.62                              |
| C12     | 122.49                | 51.72                              | 38.00                              |
| T13     | 109.90                | 60.03                              | 70.24                              |
| Q14     | 121.31                | 57.84                              | ND                                 |
| F15     | 116.19                | 63.38                              | 37.78                              |
| R16     | 125.39                | 60.45                              | ND                                 |
| C17     | 114.80                | NA                                 | ND                                 |
| R18     | 114.56                | NA                                 | ND                                 |
| T19     | 105.81                | 62.55                              | 71.70                              |
| S20     | 116.91                | 55.92                              | ND                                 |
| M 21*   | ND                    | 59.00                              | ND                                 |
| K22     | ND                    | ND                                 | ND                                 |
| Y23     | 117.78                | 55.52                              | ND                                 |
| R24     | 118.05                | ND                                 | 31.21                              |
| L25     | 109.93                | 54.41                              | ND                                 |
| N26     | 114.45                | 54.85                              | ND                                 |
| L27     | 117.25                | 58.78                              | ND                                 |
| C28     | 117.18                | 54.53                              | ND                                 |
| K29     | 117.95                | 59.95                              | ND                                 |
| K30     | 115.84                | 58.43                              | ND                                 |
| T31     | 125.20                | 60.26                              | 68.82                              |
| C32     | 113.53                | 52.77                              | 35.00                              |
| G33     | 105.80                | 46.82                              |                                    |
| T34     | 116.18                | 57.70                              | 63.40                              |
| C35     | 122.90                | 55.74                              | 63.44                              |

**Table S6. Statistics for HmK structure calculation.**

|                                        |                     |
|----------------------------------------|---------------------|
| NMR distance restraints                |                     |
| Total inter-residue restraints         | 212                 |
| Sequential ( $ i - j  = 1$ )           | 124                 |
| Medium range ( $1 <  i - j  < 5$ )     | 51                  |
| Long range ( $ i - j  \geq 5$ )        | 37                  |
| NOE violations (Å)                     |                     |
| Maximum single violation               | 0.5                 |
| rmsd of NOE violations                 | $0.071 \pm 0.001$   |
| Dihedral angle restraints              |                     |
| Total dihedral restraints              | 82                  |
| Experimental ( $\phi$ )                | 10                  |
| TALOS derived ( $\phi, \psi$ )         | 72                  |
| Dihedral angle violations ( $^\circ$ ) |                     |
| Maximum single violation               | 5                   |
| rmsd of dihedral violation             | $0.86 \pm 0.03$     |
| Deviation from idealized geometry      |                     |
| Bond lengths (Å)                       | $0.0022 \pm 0.0002$ |
| Bond angles ( $^\circ$ )               | $0.472 \pm 0.004$   |
| Improper angles ( $^\circ$ )           | $0.36 \pm 0.01$     |
| Mean rmsd values (Å)                   |                     |
| Backbone (residues 3-35)               | 0.31                |
| Heavy atoms (residues 3-35)            | 1.16                |
